# Supplementary material for: A Gene Signature of Survival Prediction for Kidney Renal Cell Carcinoma by Multi-Omic Data Analysis
Source: Int J Mol Sci. 2019 Nov 14;20(22):5720. doi: 10.3390/ijms20225720 (PMC6888680; doi:10.3390/ijms20225720)
Supplement: Supplementary file 1 [file ijms-20-05720-s001.pdf]

Supplementary Figures

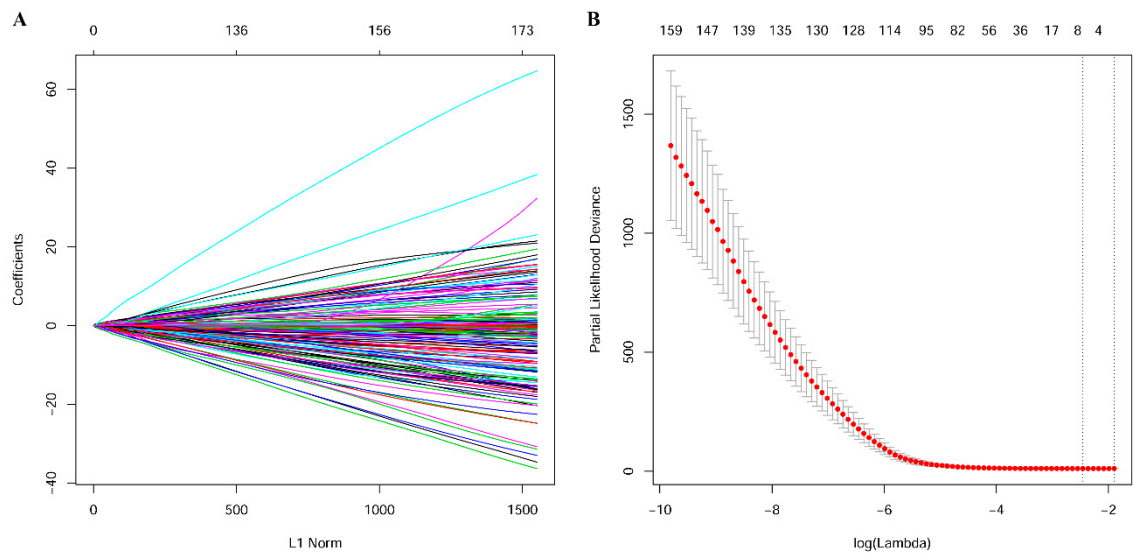

**Figure S1. LASSO regression results.** (A) Plot of LASSO coefficient profiles. (B) Plot of partial likelihood deviance for the 189 MDEGs in TCGA discovery cohort.

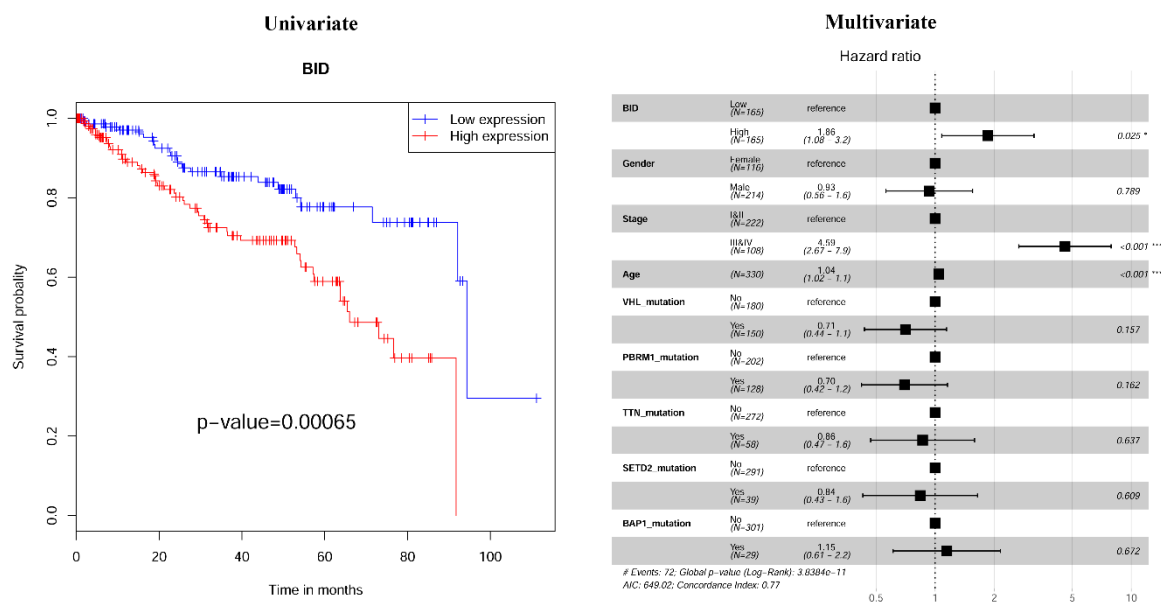

**Figure S2. The expression of *BID* associated with survival outcomes in KIRC.** Kaplan-Meier curves showed that patients with high expression of *BID* had worse

outcome compared with those with low expression of *BID*. Multivariate Cox regression analysis showed that *BID* was an independent prognostic factor.

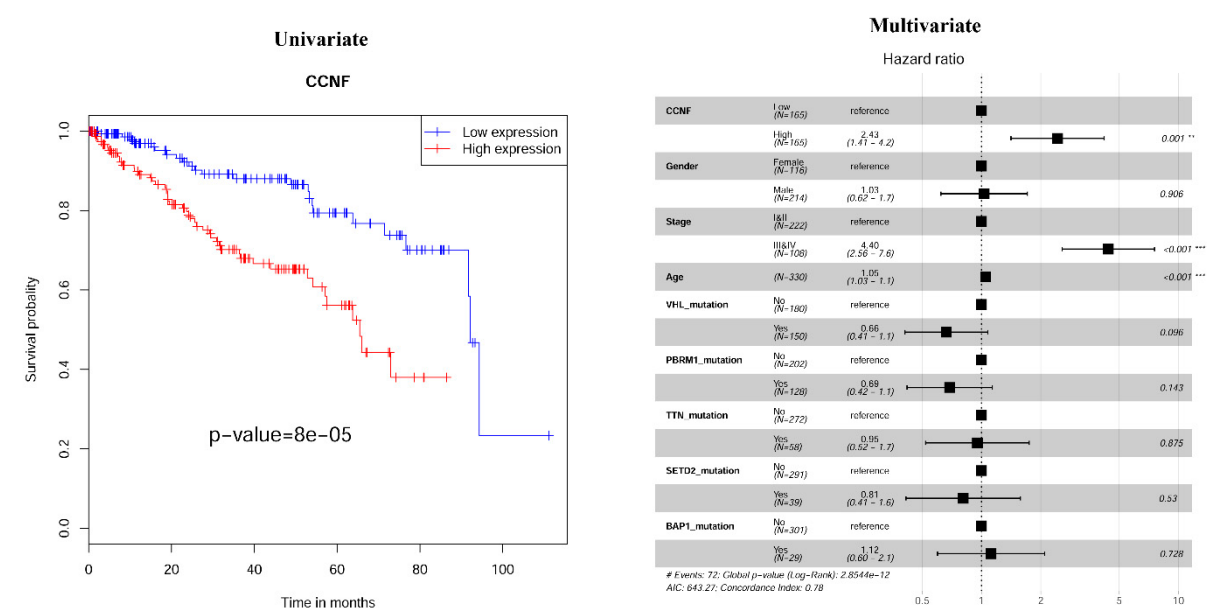

**Figure S3. The expression of *CCNF* associated with survival outcomes in KIRC.** Kaplan-Meier curves showed that patients with high expression of *CCNF* had worse outcome compared with those with low expression of *CCNF*. Multivariate Cox regression analysis showed that *CCNF* was an independent prognostic factor.

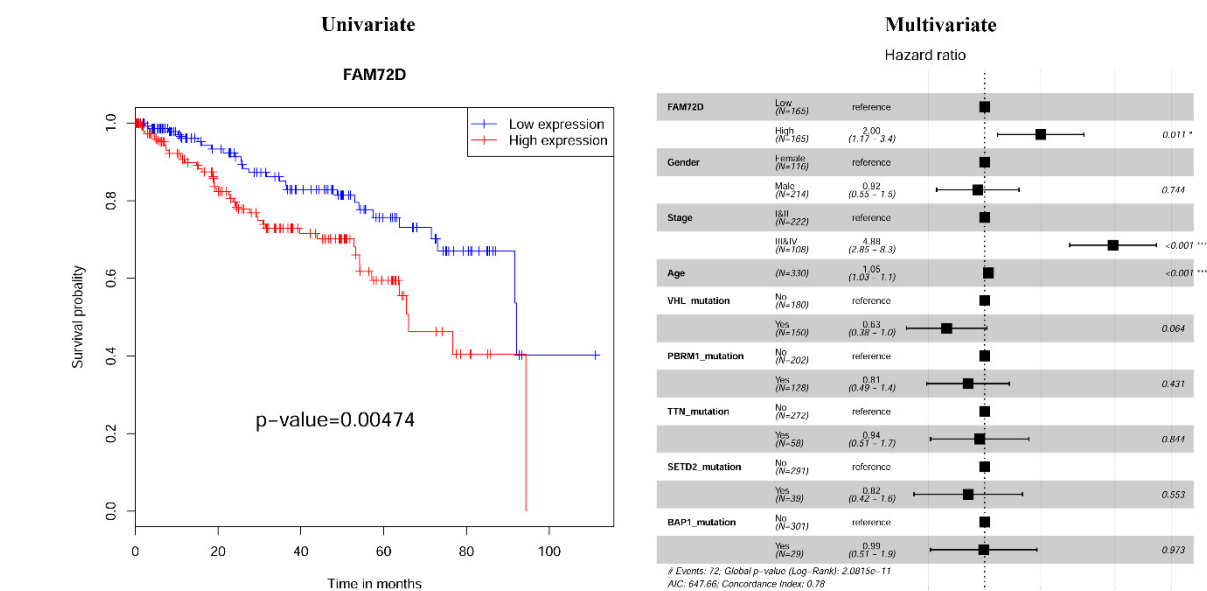

**Figure S4. The expression of *FAM72D* associated with survival outcomes in KIRC.** Kaplan-Meier curves showed that patients with high expression of *FAM72D* had worse outcome compared with those with low expression of *FAM72D*. Multivariate Cox regression analysis showed that *FAM72D* was an independent prognostic factor.

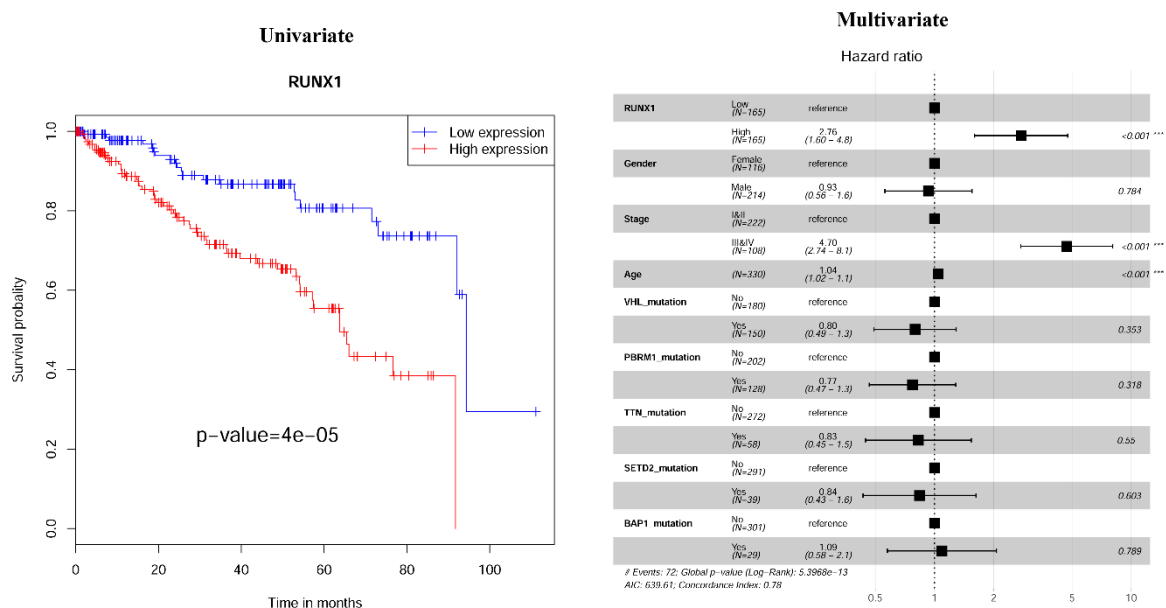

**Figure S5. The expression of *RUNX1* associated with survival outcomes in KIRC.** Kaplan-Meier curves showed that patients with high expression of *RUNX1* had worse outcome compared with those with low expression of *RUNX1*. Multivariate Cox regression analysis showed that *RUNX1* was an independent prognostic factor.

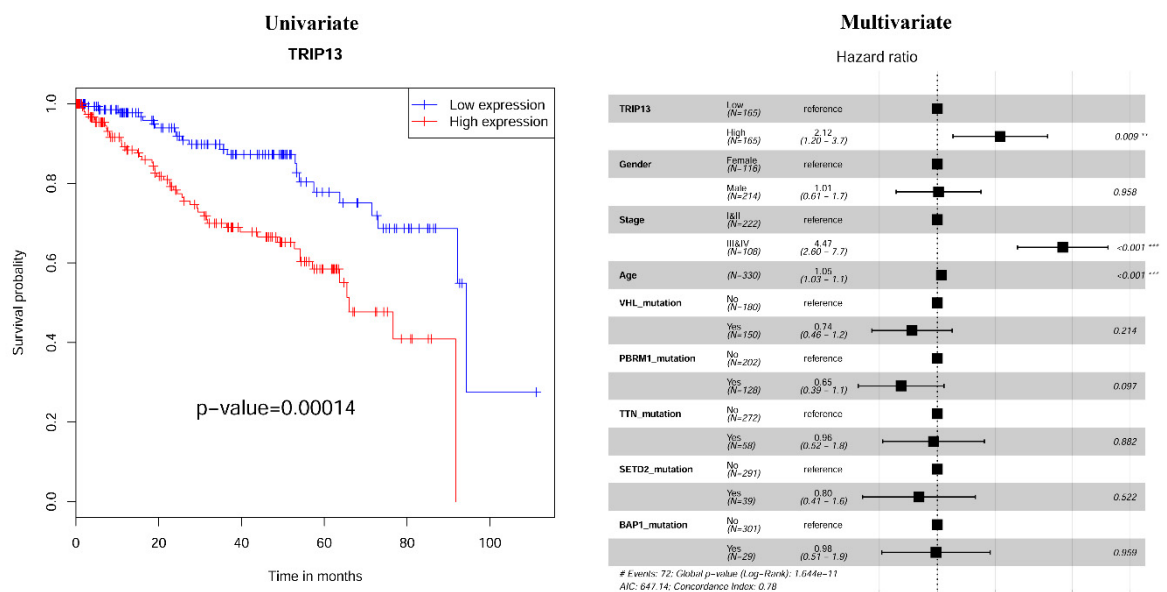

**Figure S6. The expression of *TRIP13* associated with survival outcomes in KIRC.** Kaplan-Meier curves showed that patients with high expression of *TRIP13* had worse outcome compared with those with low expression of *TRIP13*. Multivariate Cox regression analysis showed that *TRIP13* was an independent prognostic factor.

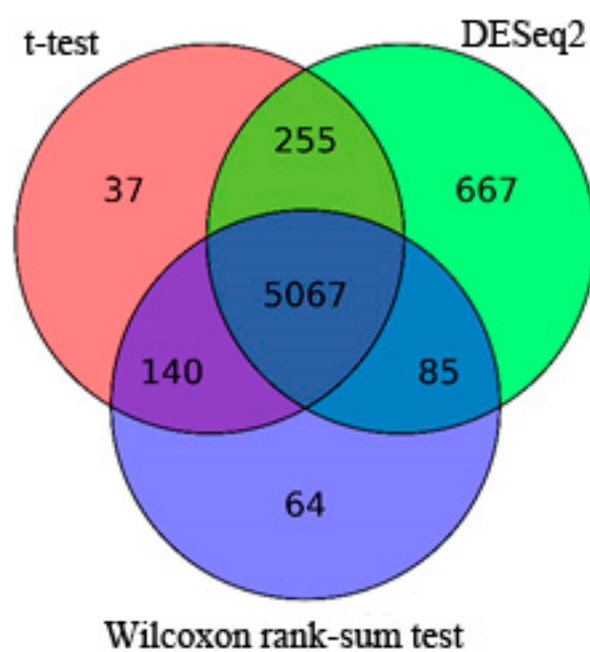

**Figure S7.** The venn diagram of DEGs found by Student's  $t$ -test, wilcoxon rank-sum test and DESeq2 under the same cut-off.

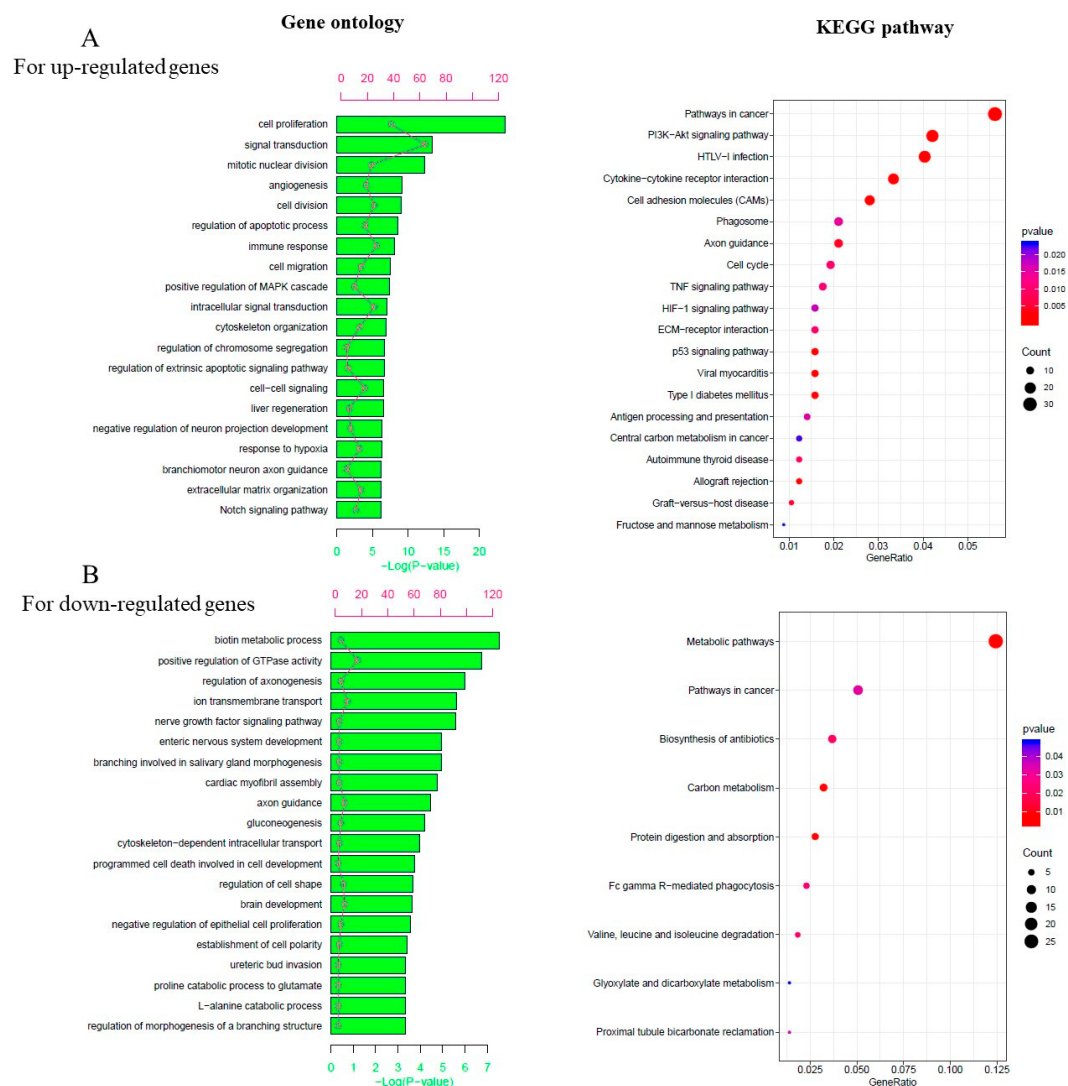

**Figure S8.** Enrichment analysis of MDEGs. The top 20 significant enriched Gene Ontology (left panel) and KEGG pathways (right panel) for (A) 629 up-regulated MDEGs; and for (B) 234 down-regulated MDEGs.

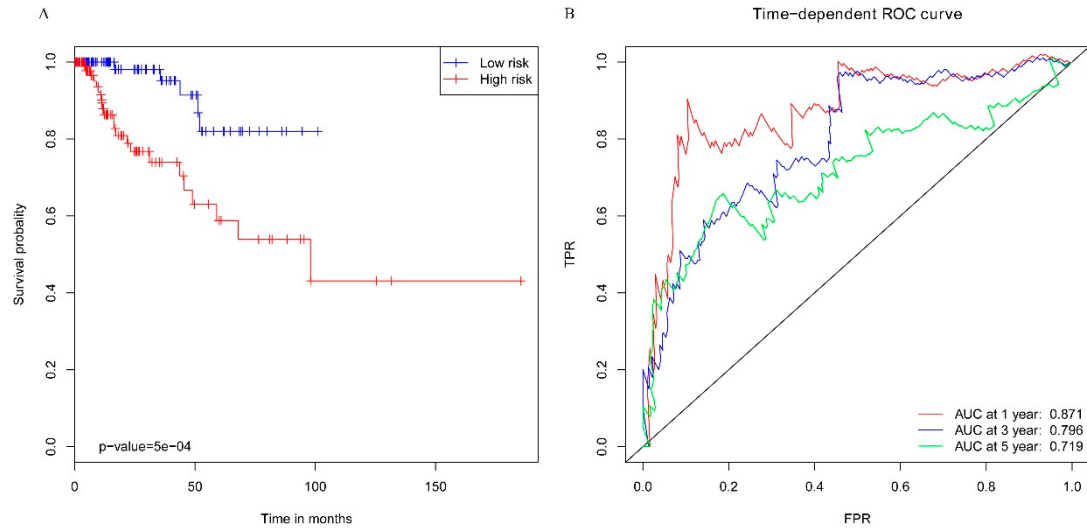

**Figure S9.** The survival analysis for KIRP. (A) The Kaplan–Meier plot (low-risk vs. high-risk group) for KIRP patients; (B) Receiver operating characteristic (ROC) analysis of the sensitivity and specificity of the survival time by a risk score based on the seven-MDEG signature of KIRP.
